# Supplementary material for: Multiple Modes of Action of a Monoclonal Antibody against Multidrug-Resistant Escherichia coli Sequence Type 131-H30
Source: PubMed Central journal article supplement (PMC5655088; doi:10.1128/aac.01428-17), 2017-10-24
Supplement: AAC.01428-17_zac011176647s1.pdf [file AAC.01428-17_zac011176647s1.pdf]

Fig. S1

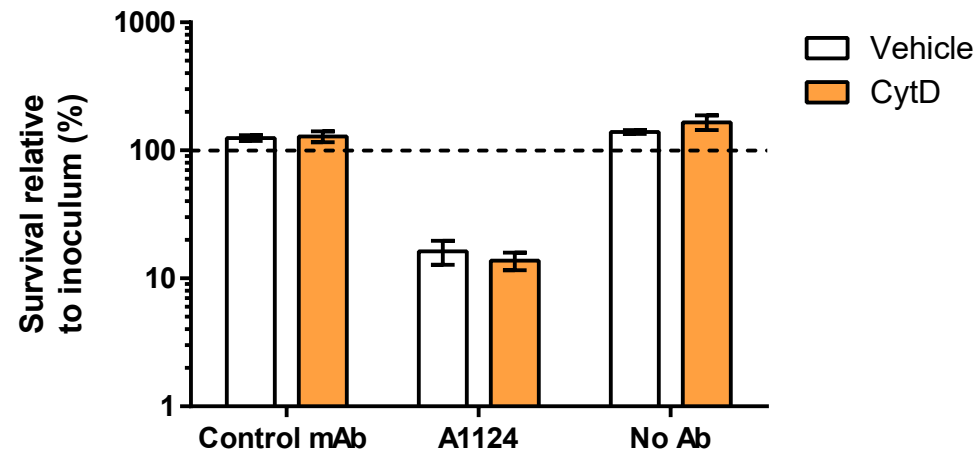

**Fig. S1. Effect of cytochalasin D on antibody/complement mediated bactericidal action.** Strain 81009 was incubated in 50% human plasma and 2.5  $\mu\text{g}/\text{mL}$  of the test antibodies in the absence or presence of 10  $\mu\text{g}/\text{mL}$  of cytochalasin D for 3 hours.

Fig. S2

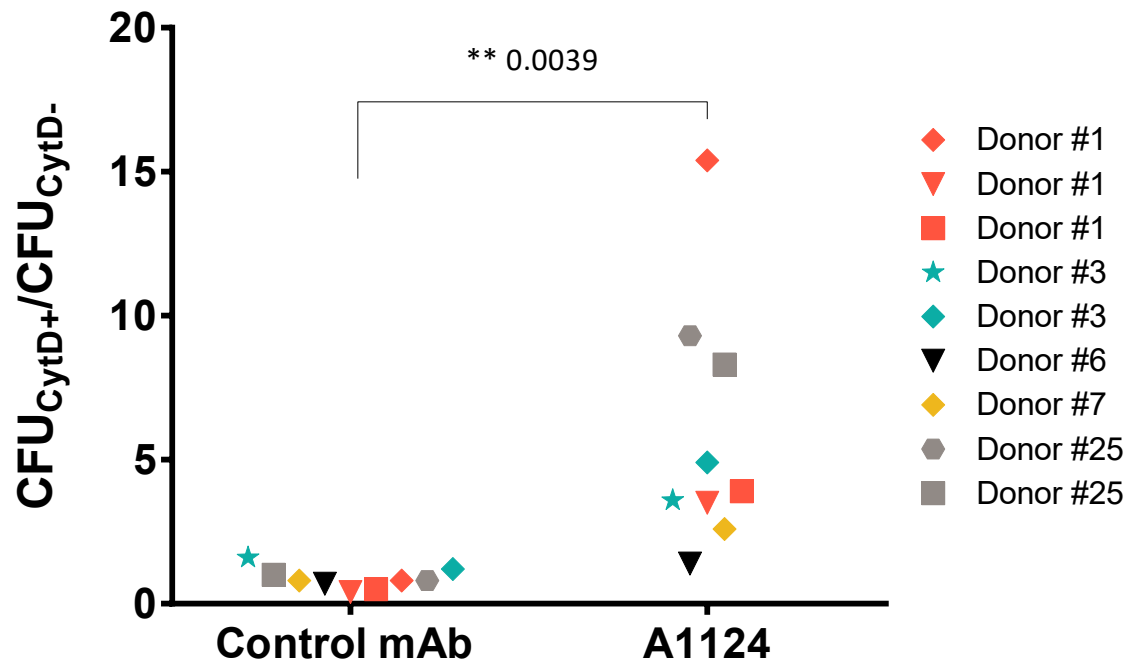

**Fig. S2. Dissection of phagocyte dependent and independent bactericidal action of human whole blood in the presence of A1124.** The ratio of surviving bacterial count in whole blood treated with cytochalasin D or a control buffer was calculated in presence of A1124 or an isotype control mAb. Ratio 1 indicates that no phagocyte function was involved in the bactericidal action of whole blood. Graph shows combined results of 9 experiments, statistical comparison was performed with Wilcoxon matched-pairs signed rank test.
